# Supplementary material
Source: MDPI journal article supplement (https://www.mdpi.com/2072-4292/8/3/260)
Supplement: s1 [file s1]

# Supplementary Materials: Monitoring Grassland Seasonal Carbon Dynamics, by Integrating MODIS NDVI, Proximal Optical Sampling, and Eddy Covariance Measurements

Enrica Nestola, Carlo Calfapietra, Craig A. Emmerton, Christopher Y.S. Wong, Donnette R. Thayer and John A. Gamon

**Table S1.**  $R^2$  and equations for fits between net  $\text{CO}_2$  flux and different midday averaging period of proxy NDVI calculated both for the full season and for the first and second halves (green-up and senescence). The average intervals considered were 5-h, 3-h and 1-h around midday (approximately 13:30 local daylight savings time). In all cases, proxy NDVI was filtered with the method explained in the text.

| $R^2$ and Equation | Full Season                     | Separate Seasons                |                                 |
|--------------------|---------------------------------|---------------------------------|---------------------------------|
|                    |                                 | Green Up                        | Senescence                      |
| Proxy NDVI (1-h)   | 0.45<br>$y = -46.167x + 13.139$ | 0.40<br>$y = -38.306x + 6.7617$ | 0.56<br>$y = -48.023x + 14.737$ |
| Proxy NDVI (3-h)   | 0.50<br>$y = -44.159x + 12.52$  | 0.49<br>$y = -41.083x + 8.547$  | 0.61<br>$y = -44.975x + 13.597$ |
| Proxy NDVI (5-h)   | 0.61<br>$y = -45.18x + 13.298$  | 0.71<br>$y = -45.55x + 11.175$  | 0.69<br>$y = -46.039x + 14.266$ |

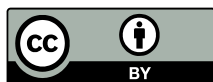

© 2016 by the authors; licensee MDPI, Basel, Switzerland. This article is an open access article distributed under the terms and conditions of the Creative Commons by Attribution (CC-BY) license (<http://creativecommons.org/licenses/by/4.0/>).
